# Supplementary material for: Advances in methods for characterizing dietary patterns: A scoping review
Source: bioRxiv or medRxiv preprint supplement (doi:10.1101/2024.06.20.24309251), 2024-07-08
Supplement: Supplementary file [file media-2.pdf]

## Supplemental File 2: Key extraction fields for review of novel analytic methods to characterize dietary patterns

| Field                | Description                                                                                                                                                               |
|----------------------|---------------------------------------------------------------------------------------------------------------------------------------------------------------------------|
| Study identification | Authors<br>Title<br>Journal<br>Year published<br>Funding source for study                                                                                                 |
| Study population     | Sample size<br>Sample characteristics                                                                                                                                     |
| Methods              | Research objectives/questions<br>Study design<br>Study name<br>Measurement of diet<br>Dietary components analyzed<br>Novel methods of analysis<br>Consideration of equity |
| Results              | Findings re: diet or diet-related outcomes<br>Author description of method utility and implications                                                                       |
| Critical review      | Author stated limitations<br>Reviewer observed limitations                                                                                                                |
